# Supplementary material
Source: PubMed Central journal article supplement (PMC4469164)
Supplement: cei0181-0142-sd1.pdf [file cei0181-0142-sd1.pdf]

## Supplementary Appendix

**Table 1. List of miR-155, U6, SOCS1, ROR $\gamma$ t, IL-17, and  $\beta$ -actin primers for real-time quantitative RT-PCR**

| Primers        | Sequence (5' to 3')                    |
|----------------|----------------------------------------|
| MiR-155        | Forward: 5'-TGCCTCCAAGTACTCCTAC-3'     |
|                | Reverse: 5'-GCGAGCACAGAATAATACGAC-3'   |
| U6             | Forward: 5'-CTCGCTTCGGCAGCACA-3'       |
|                | Reverse: 5'-AACGCTTCACGAATTTGCGT-3'    |
| SOCS1          | Forward: 5'- CCGCGACTACCTGAGCTC -3'    |
|                | Reverse: 5'- AGGGTACCCACATGGTTCCA -3'  |
| ROR $\gamma$ t | Forward: 5'-CCTGGGCTCCTCGCCTGACC-3'    |
|                | Reverse: 5'-TCTCTCTGCCCTCAGCCTTGCC-3'  |
| IL-17          | Forward: 5'-TGTCCACCATGTGGCCTAAGAG-3'  |
|                | Reverse: 5'-GTCCGAAATGAGGCTGTCTTTGA-3' |
| $\beta$ -actin | Forward: 5'-AGTTGCGTTAC ACCCTTTCTTG-3' |
|                | Reverse: 5'-TCACCTTCACCGTTCCAGTTT-3'   |
